1 **Genome expansion in early eukaryotes drove the transition from lateral gene transfer to**

2 **meiotic sex**

3 **Authors:** Marco Colnaghi<sup>\*,†</sup>, Nick Lane<sup>\*,†</sup> & Andrew Pomiankowski<sup>\*,†</sup>

4 **ORCID**

5 0000-0002-5641-9324 (MC)

6 0000-0002-5433-3973 (NL)

7 0000-0002-5171-8755 (AP)

8

9 **Affiliations:**

10 <sup>1</sup>CoMPLEX and <sup>2</sup>Department of Genetics, Evolution and Environment

11 University College London

12 London, United Kingdom

13 WC1E 6BT

14

- 15 Running title: **Transition from LGT to meiotic sex**
- 16 Keywords: Muller's ratchet, Lateral gene transfer, bacterial transformation, sex and
- 17 recombination, sexual reproduction
- 18 Corresponding author: Prof. Andrew Pomiankowski
- 19 Mailing address: Darwin Building, Gower Street, London WC1E 6BT
- 20 Phone number: 020 7679 7697
- 21 Email address: [a.pomiankowski@ucl.ac.uk](mailto:a.pomiankowski@ucl.ac.uk)
- 22

23  
24  
25  
26  
27  
28  
29  
30  
31  
32  
33  
34  
35  
36  
37  
38  
39  
40  
41  
42  
43  
44  
45  
46

## ABSTRACT

Prokaryotes generally reproduce clonally but can also acquire new genetic material via lateral gene transfer (LGT). Like sex, LGT can prevent the accumulation of deleterious mutations predicted by Muller's ratchet for asexual populations. This similarity between sex and LGT raises the question why did eukaryotes abandon LGT in favor of sexual reproduction? Understanding the limitations of LGT provides insight into this evolutionary transition. We model the evolution of a haploid population undergoing LGT at a rate  $\lambda$  and subjected to a mutation rate  $\mu$ . We take into account recombination length,  $L$ , and genome size,  $g$ , neglected by previous theoretical models. We confirm that LGT counters Muller's ratchet by reducing the rate of fixation of deleterious mutations in small genomes. We then demonstrate that this beneficial effect declines rapidly with genome size. Populations with larger genomes are subjected to a faster rate of fixation of deleterious mutations and become more vulnerable to stochastic frequency fluctuations. Muller's ratchet therefore generates a strong constraint on genome size. Importantly, we show that the degeneration of larger genomes can be resisted by increases in the recombination length, the average number of contiguous genes drawn from the environment for LGT. Large increases in genome size, as in early eukaryotes, are only possible as  $L$  reaches the same order of magnitude as  $g$ . This requirement for recombination across the whole genome can explain the strong selective pressure towards the evolution of sexual cell fusion and reciprocal recombination during early eukaryotic evolution – the origin of meiotic sex.

47 INTRODUCTION

48

49 Understanding the origin and maintenance of sex in the face of multiple costs was long  
50 considered the ‘Queen of problems in evolutionary biology’ (Bell, 1982). Sexual  
51 reproduction breaks up advantageous combinations of alleles, halves the number of genes  
52 transmitted to the offspring, and is less efficient and energetically more costly than asexual  
53 reproduction (Bell, 1982; Otto and Lenormand, 2002; Otto, 2009). In spite of these  
54 disadvantages sex is a universal feature of eukaryotic life. The presence of common  
55 molecular machinery, widespread among all eukaryotic lineages, is a strong indication that  
56 the Last Eukaryotic Common Ancestor (LECA) was already a fully sexual organism (Schurko  
57 and Logsdon, 2008; Speijer et al., 2015). Meiotic genes are commonly found in putative  
58 asexual eukaryotes, including Amoebozoa (Lahr et al., 2011; Hofstatter et al., 2018),  
59 Diplomonads (Ramesh et al., 2005), Choanoflagellates (Carr et al., 2010) and even early  
60 diverging lineages such as *Trichomonas vaginalis* (Malik et al., 2008). Eukaryotic asexuality is  
61 not ancestral but a secondarily evolved state. The selective pressures that gave rise to the  
62 origin of meiotic sex must therefore be understood in the context of early eukaryotic  
63 evolution.

64

65 Phylogenomic analysis shows that eukaryotes arose from the endosymbiosis between an  
66 archaeal host and a bacterial endosymbiont, the ancestor of mitochondria (Williams et al.,  
67 2013; Martin et al., 2015; Zaremba-Niedzwiedzka, 2017). The presence of energy-producing  
68 endosymbionts allowed the first eukaryotes to escape the bioenergetic constraints that limit  
69 the genome size and cellular complexity of prokaryotes (Lane, 2014; Lane 2020). Extra  
70 energetic availability came with the evolutionary challenge of the coexistence of two

71 different genomes within the same organism. As with other endosymbioses, the symbiont  
72 genome underwent a massive reduction, with the loss of many redundant gene functions  
73 (Timmis et al., 2004; López-Madrugal and Rosario, 2017). Alongside this, symbiont release of  
74 DNA into the host's cytosol, caused the repeated transfer of genes to the host genome,  
75 many of which were retained, contributing to the massive genome size expansion during  
76 early eukaryotic evolution (Timmis et al., 2004; Martin and Koonin, 2006; Lane 2011).

77  
78 Both the host and the endosymbiont, like modern archaea and proteobacteria, are likely to  
79 have been are capable of transformation – the uptake of exogenous DNA from the  
80 environment followed by homologous recombination (Bernstein and Bernstein, 2013; Vos et  
81 al., 2015; Ambur et al., 2016). This process involves the acquisition of foreign DNA, the  
82 recognition of homologous sequences and recombination, and therefore presents striking  
83 similarities with meiosis in Eukaryotes. The *Rad51/Dcm1* gene family, which plays a central  
84 role in meiosis, has high protein sequence similarity with *RecA*, which promotes  
85 homologous search and recombination in prokaryotes (Lin et al., 2006; Johnston et al.,  
86 2014;). It has been suggested that *RecA* was acquired by the archaeal ancestor of  
87 eukaryotes via endosymbiosis from its bacterial endosymbiont (Lin et al., 2006).

88 Alternatively, the *Rad51/Dcm1* family could have evolved from archaeal homologs of *RadA*  
89 (Seitz et al., 1998). Regardless, the presence of this common molecular machinery and the  
90 striking similarities between these processes suggest that meiosis evolved from bacterial  
91 transformation (Schurko and Logsdon, 2008; Bernstein and Bernstein, 2013). But the  
92 selective pressures that determined this transition are still poorly understood.

93

94 Historically, the main focus of the literature on the origin and the maintenance of sex has  
95 been the comparison of sexual and clonal populations, or the spread of modifiers that  
96 increase the frequency of recombination (Bell, 1982; Otto, 2009). Recombination can  
97 eliminate the linkage between beneficial and deleterious alleles due to Hill-Robertson  
98 effects (Felsenstein and Yokohama, 1976; Barton and Otto, 2005), increase adaptability in  
99 rapidly changing (Hamilton, 1980; Gandon and Otto, 2007; Jokela et al., 2009) or spatially  
100 heterogeneous (Pylkov et al., 1998; Lenormand and Otto, 2000) environments, and prevent  
101 the accumulation of deleterious mutations due to drift predicted by Muller's ratchet for  
102 asexual populations (Muller, 1968; Haigh, 1978;). These benefits of recombination outweigh  
103 the multiple costs of sexual reproduction and explain the rarity of asexual eukaryotes (Otto,  
104 2009). But remarkably, they provide us with virtually no understanding of why bacterial  
105 transformation was abandoned in favour of reciprocal meiotic recombination. The real  
106 question is not why sex is better than clonal reproduction, but why did meiotic sex evolve  
107 from prokaryotic transformation?

108  
109 Lateral Gene Transfer (LGT) has been recognised as a major force shaping prokaryotic  
110 genomes (Ochman et al., 2000; Lapierre et Gogarten, 2009; Vos et al., 2015). Unlike  
111 conjugation and transduction, mediated respectively by plasmids and phages,  
112 transformation is the only LGT mechanism to be exclusively encoded by genes present on  
113 prokaryotic chromosomes (Ambur et al., 2016), and is maintained by natural selection  
114 because it provides benefits analogous to those of sexual recombination (Levin and Cornejo,  
115 2009; Wylie et al., 2010; Takeuchi et al., 2014; Vos et al., 2015). Recombination via  
116 transformation allows adaptation by breaking down disadvantageous combinations of  
117 alleles (Levin and Cornejo, 2009; Wylie et al., 2010) and preventing the fixation of

118 deleterious mutations (Levin and Cornejo, 2009; Takeuchi et al., 2014). Some theoretical  
119 studies (Redfield et al., 1988; Redfield et al., 1997) suggest that transformation is only  
120 advantageous in presence of strong positive epistasis, a condition rarely met by extant  
121 prokaryotes. But more recent modelling work shows that transformation facilitates the  
122 elimination of deleterious mutations and prevents Muller's ratchet (Levin and Cornejo,  
123 2009; Takeuchi et al., 2014). As transformation provides similar advantages as meiotic sex,  
124 why did the first eukaryotes forsake one for the other? How did the unique conditions at  
125 the origin of eukaryotic life give rise to the selective pressures that determined this  
126 transition? In particular, is it possible that the massive expansion in genome size in early  
127 eukaryotes created the conditions for the evolution of a more systematic way of achieving  
128 recombination?

129

130 We know very little about the relation between genome size and the accumulation of  
131 deleterious mutations in populations undergoing transformation, as previous models either  
132 do not consider it explicitly (Levin and Cornejo, 2009; Wylie et al., 2010) or treat it as a  
133 constant parameter (Takeuchi et al., 2014). In order to evaluate the impact of genome size  
134 and recombination rate on the dynamics of accumulation of mutation, we develop a new  
135 theoretical and computational model of Muller's ratchet in a population of haploid  
136 individuals, undergoing LGT at particular rates and subject to variable rates of mutation. Our  
137 model includes two new parameters, genome size and recombination length, which have  
138 not been taken into account by previous theoretical studies (Levin and Cornejo, 2009; Wylie  
139 et al., 2010; Takeuchi et al., 2014). We evaluate the effects of different selective landscapes,  
140 either uniform across the genome, or split between core and accessory genomes. The  
141 severity of the ratchet is evaluated using standard approaches for measuring the rate of

142 fixation of deleterious mutations and the expected extinction time of the fittest class (Haigh  
143 1978; Gordo and Charlesworth, 2000; Takeuchi et al., 2014). We suggest that systematic  
144 recombination across the entire bacterial genomes was a necessary development to  
145 preserve the integrity of the larger genomes that arose with the emergence of eukaryotes,  
146 giving a compelling explanation for the origin of meiotic sex.

147

148

## MATERIALS AND METHODS

149

150 We use a Fisher-Wright process with discrete generations to model the evolution of a  
151 population of  $N$  haploid individuals, subject to a rate of deleterious mutation  $\mu$  per locus  
152 per generation, with LGT at a rate  $\lambda$ . The genome of an individual  $j$  is described by a state  
153 vector  $\vec{z}^{(j)} = \{z_1, \dots, z_g\}$ , where  $g$  is the number of loci. Each locus  $i$  can accumulate a  
154 number of mutations  $\{0, 1, 2, \dots\}$ . The components  $z_i^{(j)}$  are the number of deleterious  
155 mutations at the  $i$ -th locus of the  $j$ -th individual. This allows us to keep track of the number  
156 of mutants in an individual and the distribution of mutations at each locus in the population.  
157 We define fixation of a mutant at a locus when the least-loaded class (LLC) at that locus is  
158 lost. As we neglect back-mutation, fixation of a mutant is permanent.

159

160 The genome-wide mutation rate  $U = \mu g$  is calculated as the product between the mutation  
161 rate per locus per generation and the number of loci (we assume that the mutation rate is  
162 constant across the whole genome). We introduce a new parameter  $L$ , the number of  
163 contiguous genes acquired with each LGT recombination event (i.e. the size of imported  
164 DNA), which has not been taken into account by previous theoretical studies (Levin and  
165 Cornejo, 2009; Wylie et al., 2010; Takeuchi et al., 2014). In order to avoid unnecessary



166 complexity, we ignore the probability of ectopic recombination, and assume that DNA  
167 strands present in the environment (eDNA pool) are only stable for one generation before  
168 decaying irreversibly.

169

170 In the first part of this study, we assume that all mutations are mildly deleterious. Each  
171 mutation at a locus and across loci causes the same decrease in individual fitness  $s$ .

172 Following previous studies of Muller's ratchet (Haigh, 1978; Gordo and Charlesworth, 2000;  
173 Takeuchi et al., 2014), we choose a multiplicative function to model the fitness of an  
174 individual carrying  $m$  mutations, given by the formula  $w_m = (1 - s)^m$  (i.e. no epistasis). In  
175 the second part of the study we investigate more complex distributions of strength of  
176 selection across the genome. In particular, we differentiate between a strongly selected  
177 core genome and accessory genome under weaker selection. Which genes belong to the  
178 core and to the accessory genome is determined by random sampling using the MATLAB  
179 random number generator. The fitness of an individual that carries  $m_i$  mutations at locus  $i$   
180 is given by  $w(t) = \prod_{i=1}^g (1 - s_i)^{m_i}$ , where  $s_i = 0.005$  if locus  $i$  belongs to the core genome  
181 and  $s_i = 0.001$  otherwise.

182

183 Each generation, the life history of the population follows the following processes. The new  
184 generation is obtained by sampling  $N$  individuals, with replacement, from the old  
185 population, using the MATLAB function `randsample`. The probability of reproduction is  
186 proportional to the individual fitness  $w_m$ . The old generation dies, and their DNA forms the  
187 genetic pool from which the new generation acquires exogenous DNA (eDNA) for  
188 recombination. Each individual of the new generation acquires  $n^{(j)}$  new deleterious  
189 mutations, where  $n^{(j)}$  is a random variable drawn from a Poisson distribution with mean

190  $U = \mu g$ . The number of mutations and their position in the genome are determined using  
191 the MATLAB functions `random` and `randi` respectively. Each individual has a probability  $\lambda$  of  
192 undergoing LGT, determined by generating a random number using the MATLAB function  
193 `rand`. For each individual that undergoes LGT, a random donor is selected from the previous  
194 generation and  $L$  contiguous loci are randomly selected from its genome. The genome is  
195 assumed to be circular, so locus  $g$  is contiguous with locus 1. The corresponding  
196 components of the state vector of the recipient become equal to those of the donor. This  
197 can lead both to an increase or a decrease in the mutation load of the recipient. The process  
198 is started from a population free of mutation and repeated for 10,000 generations, with 50  
199 replicates for a given set of parameter values.

200

201 Two measures  $T_{ext}$  and  $\Delta m/\Delta t$  have been used to assess the effect of the ratchet (Haigh,  
202 1978; Gordo and Charlesworth, 2000; Takeuchi et al., 2014). After recombination, we  
203 calculate the number of individuals in the least-loaded class (LLC). If a mutant reaches  
204 fixation at a particular locus, we mark this as  $T_{ext}$ , the time of extinction of the LLC.  
205  $T_{ext}$  gives an estimate of the time that a population can remain free of mutations. The  
206 second measure is the genome-wide rate of fixation  $\Delta m/\Delta t$ . This is calculated as the ratio  
207 between the total number of fixed mutations over the 10,000 generations of the simulation.  
208 The rate of fixation per single locus is the ratio between the genome-wide rate of fixation  
209 and genome size  $g$ .  $\Delta m/\Delta t$  is a measure of the rate of accumulation of mutations.

210

211

212 **Results**

213

214 In absence of LGT, previous theoretical results (Haigh, 1978) have shown that, at  
215 equilibrium, the number of individuals in the least-loaded class (LLC) is  $n_0 = Ne^{-U/s}$ .  
216 Without recombination and back-mutation, the loss of the LLC is an irreversible process – a  
217 “click” of the ratchet. The magnitude of  $n_0$  determines the likelihood that the least-loaded  
218 class becomes extinct because of stochastic fluctuations (i.e. genetic drift). High values of  $n_0$   
219 increase the expected time of extinction of the LLC, whereas small values make the LLC  
220 more vulnerable to stochastic fluctuations (Muller, 1964; Haigh, 1978;). Therefore  $n_0$  is a  
221 good indication of the speed of the ratchet (Haigh, 1978). Expressing the genome wide  
222 mutation rate  $U$  as  $\mu \times g$  allows the equilibrium number of individuals in the LLC to be  
223 rewritten  $n_0 = Ne^{-\mu g/s}$ . The speed of the ratchet scales exponentially with genome size  
224 and mutation rate, and is negatively correlated with the strength of selection. Crucially, the  
225 impact of genome size is much stronger than that of population size (Figure 2). For example,  
226 a 2-fold increase in genome size can increase the speed of the ratchet by several orders of  
227 magnitude, whereas even a 10-fold reduction in population size has a rather meagre effect,  
228 except at low values (Figure 2). Therefore, any increase in genome size must be balanced by  
229 a proportional increase in strength of selection in order to avoid a drastic reduction of  $n_0$ .

230

231 *i. Uniform strength of selection*

232

233 Genome size increases the severity of the ratchet, measured by  $T_{ext}$ , the expected  
234 extinction time of the LLC (Figure 3). Large genomes gain *de novo* mutations at a faster rate  
235 than small ones, leading to a decline in LLC extinction time, as there are more independent  
236 loci that can possibly fix for the mutant (Figure 3, no LGT). LGT reduces the severity of the  
237 ratchet and increase the expected LLC extinction time (Figure 3), making the population less

238 vulnerable to stochastic fluctuations. The beneficial effect is more evident as recombination  
239 length ( $L$ ) and LGT rate ( $\lambda$ ) increase (Figure 3). However, as genome size ( $g$ ) increases the  
240 expected extinction time plummets, rapidly approaching that of a clonal population with a  
241 larger genome, both in the presence of high ( $\lambda = 0.1$ , Figure 3A) and low ( $\lambda = 0.01$ , Figure  
242 3B) LGT rates. The sole exception is when recombination length is of the same order as the  
243 magnitude of genome size ( $L = 0.2g$ , Figure 3). Only under this condition can increases in  
244 genome size be tolerated without a drastic decline in  $T_{ext}$ .

245

246 The rate of accumulation of deleterious mutations shows an analogous pattern (Figure 4).  
247 As genome size increases, the rate of mutation accumulation markedly increases, both  
248 genome wide and per locus (Figure 4). In a small genome, LGT reduces the speed at which  
249 mutations accumulate in a population, counteracting the ratchet effect both in the presence  
250 of a high ( $\lambda = 0.1$ ) or low ( $\lambda = 0.01$ ) LGT rate (Figure 4). This effect is more pronounced  
251 with higher LGT rates ( $\lambda$ ) and longer recombination lengths ( $L$ ). But even in presence of LGT,  
252 large genomes are subjected to higher rates of accumulation, comparable to those of a  
253 purely clonal population (Figure 4). Only when recombination length approaches the same  
254 order of magnitude as genome size ( $L = 0.2g$ ) and occurs at high frequency ( $\lambda = 0.1$ ) can  
255 LGT sufficiently repress mutation accumulation in large genomes (Figure 4B and 4D).

256

257 *ii. Non-uniform strength of selection*

258

259 Different loci in the genome are typically under different strengths of selection. In order to  
260 capture this fact in our model, we consider the core and accessory genomes differently. The  
261 size of the core genome is fixed ( $g_c = 50$ ), while the accessory genome size varies as the

262 genome expands. The core loci are under strong selection ( $s = 0.005$ ) and the accessory  
263 loci are under weak selection ( $s = 0.001$ ). Core and accessory loci are randomly distributed  
264 in the genome.

265

266 Under this selection regime, mutations preferentially accumulate in the accessory genome,  
267 where the strength of selection is lower, while the core genome accumulates mutations at a  
268 relatively slow rate (Fig. 5). Genome size expansion results in more severe ratchet effects,  
269 with a marked increase in the rate of mutations reaching fixation in the regions of the  
270 genome that are under weaker selection, alongside a moderate increase in core genome  
271 mutation fixation rate (Fig 5). LGT is effective in reducing the mutational burden, both in the  
272 accessory and in the core genome; but this beneficial effect is less evident in large genomes  
273 than in small ones (Fig 5). Recombination across the whole genome ( $L = 0.2g$ ) completely  
274 eliminates fixation in the core genome, regardless of genome size, and markedly reduces  
275 the fixation rate in the accessory genome, facilitating genomic expansion (Fig 5).

276

## 277 **Discussion**

278

279 Asexual organisms are well known to be vulnerable to the effects of drift, which reduces the  
280 genetic variation within a population, causing the progressive and inescapable accumulation  
281 of deleterious mutations known as Muller's ratchet (Muller, 1964; Haigh, 1978; Otto, 2009).

282 In eukaryotes, sexual recombination counters the effects of genetic drift and restores  
283 genetic variance, increasing the effectiveness of purifying selection and preventing

284 mutational meltdown (Otto, 2009). In prokaryotes, sexual fusion does not occur. But the

285 exchange of genetic material does occur through transformation, the lateral gene transfer

286 (LGT) and recombination of environmental DNA (eDNA). Meiotic recombination likely arose  
287 from bacterial transformation. Understanding the reasons why this transition occurred  
288 during early eukaryotic evolution are critical to a rigorous understanding of the Queen of  
289 problems in evolutionary biology, the origin of sex. Sex did not arise from cloning, as tacitly  
290 assumed in the classic theoretical literature, but from prokaryotic transformation, a very  
291 different question which we explored. To elucidate this transition, we examined the  
292 effectiveness of LGT at countering the dynamics of Muller's ratchet, to understand where  
293 and why LGT becomes ineffective at maintaining genome integrity, necessitating the  
294 transition to sexual reproduction in early eukaryotes.

295

296 We assessed the effect of LGT on the severity of the ratchet using the expected extinction  
297 time of the least-loaded class and the rate of fixation of deleterious mutations. Unlike  
298 previous modelling work, we included genome size as a variable as opposed to a constant  
299 (e.g. 100 loci; Takeuchi et al., 2014). Genome size is plainly important in relation to the  
300 evolution of eukaryotes, which have expanded considerably in almost every measure of  
301 genome size (e.g. DNA content, number of protein-coding genes, size of genes, number of  
302 gene families, regulatory DNA content, Lane and Martin, 2010). Considering gene number in  
303 our model reveals a strong inverse relationship between genome size and the benefits of  
304 LGT. In small genomes, LGT is effective at preventing Muller's ratchet, with long extinction  
305 times (Fig. 3) and low rates of mutation accumulation (Fig. 4), validating the results of  
306 previous theoretical studies (Takeuchi et al., 2014). However, we show that large genomes  
307 limit the efficiency of LGT and present a greater mutational target than smaller ones,  
308 increasing the overall input of mutations to the genome. This increases the severity of the

309 ratchet leading to shorter extinction times and faster rates of mutation accumulation (Fig. 3-  
310 4).

311

312 The increased potency of the ratchet as genome size increases is ameliorated by an increase  
313 in the rate of LGT ( $\lambda$ ; Fig. 3-4). Is this a viable option for prokaryotic species to enable them  
314 to expand genome size? In a number of species, LGT has been estimated as being the same  
315 magnitude (or higher) as the rate of nucleotide substitution, including *B. cereus* (Hao and  
316 Golding, 2006), *Streptococcus* (Marri et al., 2006), *Corynebacterium* (Marri et al., 2007), and  
317 *Pseudomonas syringae* (Nowell et al., 2014). Rates are highly variable among species  
318 (Croucher et al., 2012; Vos et al., 2015; Johnston et al., 2015). Competence for

319 transformation can be induced by a range of environmental stressors including DNA  
320 damage, high cell density and limited nutrient availability (Bernstein and Bernstein, 2013).

321 But LGT rates are constrained by eDNA availability, which depends on the amount of DNA in  
322 the environment and the degree of sequence homology (Croucher et al., 2012; Vos et al.,

323 2015). The model predicts that higher LGT rates will strengthen purifying selection and  
324 favour the elimination of mutants. This result is compatible with the strong correlation

325 observed between the number of horizontally transferred genes and genome size across a  
326 range of prokaryotes (Jain et al., 2003; Fuchsman et al., 2017). However, it is not clear to

327 what extent the rate of LGT can be modified. Our modelling suggests that larger bacterial  
328 genomes are more likely to be sustained by higher rates of LGT, but the benefits of LGT as

329 actually practiced by bacteria – the non-reciprocal uptake of small pieces of DNA comprising  
330 one or a few genes – are unlikely to sustain eukaryotic-sized genomes. In short, we show

331 that LGT as actually practised by bacteria cannot prevent the degeneration of larger

332 genomes.

333  
334 Importantly, we show that the benefits of LGT also increase with recombination length ( $L$ ;  
335 Fig. 3-4). In gram positive bacteria, recombination of large eDNA sequences is the exception  
336 rather than the rule (Croucher et al., 2012; Mell et al., 2014). Experimental work indicates  
337 that the distribution of eDNA length acquired is skewed towards short fragments, with a  
338 third of transformation events less than 1kb, a median around 2-6kb and range extending  
339 up to ~50kb (Croucher et al., 2012). This appears to be an evolved state in *Streptococcus*  
340 *pneumoniae*, as the dedicated system cleaves eDNA into smaller fragments before  
341 recombination takes place (Claverys et al., 2009). Some studies have reported a larger  
342 median and range for transfer sizes (Hiller et al., 2019). Given that loci are around 1kb, with  
343 short intergenic regions, this represents the potential for several genes to be transferred in  
344 a single LGT event (Mira et al., 2001; Moran, 2002). There are several potential reasons for  
345 focus on small genomic pieces in LGT recombination. Cleavage of eDNA into smaller  
346 sequences increases the likelihood of homologous recombination, while the acquisition of  
347 long sequences can be associated with loss of genetic information (Croucher et al., 2012)  
348 and can potentially disrupt regulatory and physiological networks (Baltrus, 2013). It has also  
349 been suggested that the small size of recombination fragments is a mechanism for  
350 preventing the spread of mobile genetic elements (Croucher et al., 2016). On the other  
351 hand, gram-negative bacteria do not cleave eDNA on import, but their ability to acquire  
352 eDNA sequences >50kb is limited by physical constraints (Mell and Redfield, 2014). The high  
353 variability of LGT size suggest that there is flexibility and the potential for evolutionary  
354 change. But there is no evidence that larger genome size is accompanied by a higher  
355 recombination length. To our knowledge bacteria do not load large pieces of chromosome



356 via LGT (i.e. >10% of a genome), although in principle it should be possible for them to do

357 so.

358

359 As for purely asexual populations (Haigh, 1978), the strength of selection plays a critical role

360 in determining the rate of mutation accumulation, with regions of the genome under strong

361 selection accumulating mutations at a low rate (Fig. 5-6). The ratchet effect is mainly

362 observed in the accessory genome, with mutations accumulating preferentially in loci under

363 weak selection (Fig. 5-6). Our model predicts that genome size expansion can occur in

364 populations under strong purifying selection (e.g. due to a larger effective population size).

365 Strong selection decreases the rate of genetic information loss, allowing the acquisition of

366 new genetic content without an attendant increase in mutation fixation. This prediction is in

367 agreement with the positive correlation observed between genome size and dN/dS in

368 bacteria (Novitchkov et al., 2008; Bobay and Ochman, 2018). However, organisms under

369 similar selective pressures often display a broad range of genome sizes (Novitchkov et al.,

370 2008), indicating that other factors, including mutation rate and LGT, have a strong impact

371 on prokaryotic genome size. Under high mutation rate and weak selective pressure, genome

372 size expansion is disfavored.

373

374 Eukaryotes, including simple unicellular organisms, typically possess much larger genomes

375 than prokaryotes, as noted earlier (Koonin, 2009; Elliot and Gregory, 2015). Eukaryotic

376 genome size expansion was favored by the acquisition of an endosymbiont, which evolved

377 into the mitochondrion. This released bioenergetic constraints on cell size and allowed the

378 evolution of genetic and morphological complexity (Lane, 2014; Lane, 2020). The

379 endosymbionts underwent gene loss, a frequently observed process in extant

380 endosymbiotic relationships (López-Madrugal and Rosario, 2017) and transferred multiple  
381 genes to the host, enriching the host's genome size with genes of proto-mitochondrial origin  
382 (Timmis et al., 2004; Martin et al., 2015). The acquisition of endosymbiotic DNA is also  
383 thought to have allowed the spread of mobile genetic elements in the host cell's genome,  
384 contributing to the increase in genome size and likely increasing the mutation rate (Timmis  
385 et al., 2004; Martin and Koonin, 2006; Rogozin et al., 2012). The loss of energetic constraints  
386 on genome size probably also facilitated gene and even whole genome duplications, leading  
387 to several thousand new gene families in LECA (Koonin, 2004), as well as lower selective  
388 pressure for gene loss after LGT (Szollosi, Derenyi and Vellai, 2006).

389  
390 Such a large genome brought the first eukaryotes under the threat of mutational  
391 accumulation, creating the need for stronger purifying selection in order to keep the  
392 expanded genetic content free from mutations. Our results offer a possible explanation of  
393 why this process drove the transition from LGT to meiotic recombination at the origin of  
394 sex. In small prokaryotic genomes, LGT provides sufficient benefits to maintain genome  
395 integrity, without incurring the multiple costs associated with sexual reproduction. But LGT  
396 fails to prevent the accumulation of deleterious mutations in larger genomes, promoting the  
397 loss of genetic information and therefore constraining genome size. Our model shows that  
398 genome size expansion is only possible through a proportional increase in recombination  
399 length. We considered a recombination length  $L = 0.2g$ , which is equivalent to 500 genes  
400 for a species with genome size of 2,500 genes – two orders of magnitude above the average  
401 estimated eDNA length in extant bacteria (Croucher et al., 2012). Recombination events of  
402 this magnitude are unknown among prokaryotes, possibly because of physical constraints  
403 on eDNA acquisition. Limiting factors likely include the restricted length of eDNA, uptake

404 kinetics and the absence of an alignment mechanism for large eDNA strands (Thomas and  
405 Nielsen, 2005; Baltrus, 2013; Croucher et al., 2016).

406

407 The requirement for a longer recombination length  $L$  cannot be achieved by LGT, which  
408 must therefore have failed to maintain a mutation-free genome, generating a strong  
409 selective pressure towards the evolution of a new mechanism of inheritance with the loss of  
410 energetic constraints on genome size. However, this magnitude of  $L$  is easily achievable via  
411 meiotic sex. The transition from LGT to meiotic sex involves the evolution of cell fusion, the  
412 transition from circular to linear chromosomes, whole-chromosome alignment and  
413 homologous recombination (Lane, 2011; Goodenough and Heitman, 2014). We have not  
414 explicitly modelled the details of this process or considered the order in which these factors  
415 arose. Nonetheless, our results show that eukaryotes had to increase the magnitude of  
416 recombination length beyond the limits of LGT in order to permit the expansion in genetic  
417 complexity without the attendant increase in mutational burden. Eukaryotes had to  
418 abandon LGT in order to increase recombination length and maintain a large genome. Sex  
419 was forced upon us.

420

## 421 CONCLUSION

422

423 The benefits of LGT in maintaining genome integrity decline rapidly with genome size,  
424 making large genomes vulnerable to the accumulation of mutations. This effect constrains  
425 genome size in prokaryotes, and becomes even more severe with small population sizes and  
426 high mutation rates. These constraints can be partially overcome by increases in LGT rate  
427 and recombination length (Fig 3-4). But only recombination across the whole genome can

428 wholly overcome these constraints. With the massive genome expansion at the origin of  
429 eukaryotes, the evolution of meiosis allowed homologous recombination across the whole  
430 genome, and not only across a limited region spanning little more than a few loci, as in LGT.  
431 The endosymbiosis that gave rise to the first eukaryotes led to the frequent transfer of  
432 genes from the endosymbiont to the host, resulting in a large expansion in genome size,  
433 likely coupled to high mutation rates. Our model shows that these conditions wrought the  
434 failure of LGT in preventing Muller's ratchet. The resulting selective pressure promoted the  
435 evolution of sexual cell fusion and meiosis, maximizing recombination length and protecting  
436 eukaryotic genomes from excessive mutational burden. LGT in prokaryotes gave way to  
437 meiotic sex in eukaryotes because only sex can sustain the expansion in genome size that  
438 underpins all eukaryotic complexity.

439

440

441

442

## REFERENCES

443 Ambur, O. H., Engelstädter, J., Johnsen, P. J., Miller, E., and Rozen, D. E. 2016 Steady at the

444 wheel: conservative sex and the benefits of bacterial horizontal gene transfer. *Philos. Trans.*

445 *R Soc. Lond. B Biol. Sci.* 371:20150528.

446

447 Baltrus, D. A. 2013 Exploring the costs of horizontal gene transfer. *Trends Ecol. Evol.* 28:

448 489–495.

449

450 Barton, N. H., and Otto S. P. 2005 Evolution of recombination due to random drift. *Genetics*

451 169: 2353–2370.

452

453 Bell, G. 1982 *The masterpiece of nature: the evolution and genetics of sexuality*. Berkeley,

454 CA: University of California Press.

455

456 Bernstein, H., and Bernstein, C. 2013 Evolutionary origin and adaptive function of

457 meiosis. *Meiosis*, 1.

458

459 Bobay, L., and Ochman, H. 2018 Factors driving effective population size

460 and pan-genome evolution in bacteria. *BMC Evolutionary Biology* 18: 153.

461

462 Carr, M., Leadbeater, B. S., and Baldauf, S. L. 2010 Conserved meiotic genes point to sex in

463 the choanoflagellates. *J. Eukaryot. Microbiol.* 57: 56–62.

464

465 Claverys, J. P., Martin, B., and Polard, P. 2009 The genetic transformation machinery:

466 composition, localization, and mechanism. *FEMS Microbiol. Rev.* 33: 643–656.

467

468 Croucher, N. J., Mostowy, R., Wymant, C., Turner, P., Bentley, S. D., and Fraser, C. 2016

469 Horizontal DNA transfer mechanisms of bacteria as weapons of intragenomic conflict. *PLoS*

470 *Biol.* 14: e1002394.

471

472 Croucher, N. J., Harris, S. R., Barquist, L., Parkhill, J., and Bentley, S. D. 2012 A high-

473 resolution view of genome-wide pneumococcal transformation. *PLoS Pathog.* 8: e1002745.

474

475 Elliot, T. A., and Gregory, T. R. 2015 What's in a genome? The C-value enigma and the

476 evolution of eukaryotic genome content. *Phil. Trans. R. Soc. B* 370: 20140331.

477

478 Felsenstein, J., and Yokoyama, S. 1976 The evolutionary advantage of recombination. II.

479 Individual selection for recombination. *Genetics* 83: 845–859

480

481 Fuchsman, C. A., Collins, R. E., Rocap G., and Brazelton W. J. 2017 Effect of the environment

482 on horizontal gene transfer between bacteria and Archaea. *PeerJ* 5: e3865.

483

484 Gandon, S., and Otto, S. P. 2007 The evolution of sex and recombination in response to

485 abiotic or coevolutionary fluctuations in epistasis. *Genetics* 175: 1835–1853.

486

487 Goodenough, U., and Heitman, J. 2014 Origins of eukaryotic sexual reproduction. *Cold*

488 *Spring Harbor Perspect. Biol.* 6, a016154.

489

- 490 Gordo, I., and Charlesworth, B. 2000 The degeneration of asexual haploid populations and  
491 the speed of Muller's ratchet. *Genetics* 154: 1379–1387.
- 492
- 493 Hamilton, W. D. 1980 Sex vs. non-sex vs. parasite. *Oikos* 35: 282–290.
- 494
- 495 Haigh, J. 1978 The accumulation of deleterious genes in a population—Muller's  
496 ratchet. *Theor. Pop. Biol.* 14: 251–267.
- 497
- 498 Hao, W., and Golding, G. B. 2006 The fate of laterally transferred genes: life in the fast lane  
499 to adaptation or death. *Genome Res.* 16: 636–643.
- 500
- 501 Hiller, N. L., Ahmed, A., Powell, E., Martin, D. P., Eutsey R., et al. 2010 Generation of  
502 genic diversity among *Streptococcus pneumoniae* strains via horizontal gene transfer  
503 during a chronic polyclonal pediatric infection. *PLoS Pathog.* 6: e1001108.
- 504
- 505 Hofstatter, P. G., Brown, M. W., and Lahr, D. J. 2018 Comparative genomics supports sex  
506 and meiosis in diverse Amoebozoa. *Genome Biol. Evol.* 10: 3118–3128.
- 507
- 508 Jain, R., Riviera, M. C., Moore, J. E., and Lake, J. A. 2003 Horizontal gene transfer accelerates  
509 genome innovation and evolution. *Mol. Biol. Evol.* 20: 1598–1602.
- 510
- 511 Johnston, C., Martin, B., Fichant, G., Polard, P., and Claverys, J-P. 2014 Bacterial  
512 transformation: distribution, shared mechanisms and divergent control. *Nat. Rev. Microbiol.*  
513 12: 181–96.

514

515 Jokela, J., Dybdahl, M. F., and Lively, C. M. 2009 The maintenance of sex, clonal dynamics,  
516 and host-parasite coevolution in a mixed population of sexual and asexual snails. *Am. Nat.*  
517 174: S43–S53.

518

519 Koonin, E. V. 2009 Evolution of genome architecture. *Int. J. Biochem. Cell Biol.*, 41: 298–306.

520

521 Koonin, E. V., Fedorova N., D., Jackson J. D., Jacobs A., R., Krylov D., M., et al. 2004 A  
522 comprehensive evolutionary classification of proteins encoded in complete eukaryote  
523 genomes. *Genome Biol.* 5: R7.

524

525 Lahr, D. J., Parfrey, L. W., Mitchell, E. A., Katz, L. A., and Lara, E. 2011 The chastity of  
526 amoebae: re-evaluating evidence for sex in amoeboid organisms. *Proc. R. Soc. B Biol.*  
527 *Sci.* 278: 2081–2090.

528

529 Lane N. 2020 How energy flow shapes cell evolution. *Curr. Biol.* (in press).

530

531 Lane, N. 2014 Bioenergetic constraints on the evolution of complex life. *Cold Spring Harbor*  
532 *Perspect. Biol.* 6: a015982.

533

534 Lane, N. 2011 Energetics and genetics across the prokaryote-eukaryote divide. *Biol. Direct* 6:  
535 35.

536

537 Lane, N., and Martin, W. 2010 The energetics of genome complexity. *Nature* 467: 929–934.



538

539 Lapiere, P., and Gogarten, J. P. 2009 Estimating the size of the bacterial pan-genome.

540 Trends Genet. 25: 107–110.

541

542 Lenormand, T., and Otto S. P. 2000 The evolution of recombination in a heterogeneous

543 environment. Genetics 156: 423–438.

544

545 Levin, B.R., and Cornejo, O. E. 2009 The population and evolutionary dynamics of

546 homologous gene recombination in bacterial populations. PLoS Genet. 5: e1000601.

547

548 Lin, Z., Kong, H., Nei, M., and Ma, H. 2006 Origins and evolution of the *RecA/RAD51*

549 gene family: Evidence for ancient gene duplication and endosymbiotic gene transfer.

550 Proc. Nat. Aca. Sci. USA 103: 10328–10333.

551

552 López-Madriral S., and Rosario G. 2017 Et tu, Brute? Not even intracellular mutualistic

553 symbionts escape horizontal gene transfer. Genes 8: 247.

554

555 Malik, S. B., Pightling, A. W., Stefaniak, L. M., Schurko, A. M., and Logsdon Jr, J. M. 2008 An

556 expanded inventory of conserved meiotic genes provides evidence for sex in *Trichomonas*

557 vaginalis. PLoS one 3: 8.

558

559 Marri, P. R., Hao, W., and Golding, G. B. 2006 Gene gain and gene loss in *Streptococcus*: is it

560 driven by habitat? Mol. Biol. Evol. 23: 2379–2391.

561

- 562 Marri, P. R., Hao, W., and Golding, G. B. 2007 The role of laterally transferred genes in  
563 adaptive evolution BMC Evol. Biol. 7: S8.  
564
- 565 Martin, W., and Koonin, E. V. 2006 Introns and the origin of nucleus-cytosol  
566 compartmentalization. Nature 440: 41–45.  
567
- 568 Martin, W., Garg, S., and Zimorski, V. 2015 Endosymbiotic theories for eukaryote origin.  
569 Philos. Trans. R. Soc. Lond. B. Biol. Sci. 370: 20140330.  
570
- 571 Mell, J. C., and Redfield, R. 2014 Natural competence and the evolution of DNA uptake  
572 specificity. J Bacteriol. 196: 1471–1483.  
573
- 574 Mell, J. C., Lee, J. Y., Firme, M., Sinha, S., and Redfield, R. J. 2014 Extensive cotransformation  
575 of natural variation into chromosomes of naturally competent *Haemophilus influenzae*. G3  
576 4: 717–731.  
577
- 578 Mirzaghaderi, G., and Horandl, E. 2016 The evolution of meiotic sex and its alternatives.  
579 Proc. R. Soc. B 283: 20161221.  
580
- 581 Mira, A., Ochman, H., and Moran, N. A. 2001 Deletional bias and the evolution of bacterial  
582 genomes. Trends Genet. 17: 589–596.  
583
- 584 Moran, N. A. 2002 Microbial minimalism: genome reduction in bacterial pathogens. Cell  
585 108: 583–586.

586

587 Muller, H. J. 1964 The relation of recombination to mutational advance. *Mutat. Res. Mol.*

588 *Mech. Mutagen.* 1: 2–9.

589

590 Müller, M., Mentel, M., van Hellemond, J. J., Henze, K., Woehle, C., *et al.* 2012 Biochemistry

591 and evolution of anaerobic energy metabolism in eukaryotes. *Microbiol. Mol. Biol. Rev.* 76:

592 444–495.

593

594 Novichkov, P. S., Wolf, Y. I., Dubchack, I., and Koonin, E. V. 2009 Trends in prokaryotic

595 evolution revealed by comparison of closely related bacterial and archaeal genomes. *Journal*

596 *of Bacteriology* 191: 65–73.

597

598 Nowell, R. W., Green, S., and Sharp, P. M. 2014 The extent of genome flux and its role in the

599 differentiation of bacterial lineages. *Genome Biol. Evol.* 6: 1514–1529.

600

601 Ochman, H., Lawrence, J. G., and Groisman, E. A. 2000 Lateral gene transfer and the nature

602 of bacterial innovation. *Nature* 405: 299–304.

603

604 Otto, S. P., and Lenormand, T. 2002 Resolving the paradox of sex and recombination. *Nat.*

605 *Rev. Genet.* 3: 252–261.

606

607 Otto, S. P. 2009 The evolutionary enigma of sex. *Am. Nat* 174: S1–S14.

608

- 609 Pylkov, K. V., Zhivotovsky, L. A., and Feldman, M. W. 1998 Migration versus mutation in the  
610 evolution of recombination under multi-locus selection. *Genet. Res.* 71: 247–256.  
611
- 612 Ramesh, M. A., Malik, S. B., and Logsdon Jr, J. M. 2005 A phylogenomic inventory of meiotic  
613 genes: evidence for sex in *Giardia* and an early eukaryotic origin of meiosis. *Curr. Biol.* 15:  
614 185–191.  
615
- 616 Redfield, R. J. 1988 Evolution of bacterial transformation: is sex with dead cells ever better  
617 than no sex at all? *Genetics* 119: 213–221.  
618
- 619 Redfield, R. J., Schrag, M. R., and Dean, A. M. 1997 The evolution of bacterial  
620 transformation: sex with poor relations. *Genetics*, 146: 27-38.  
621
- 622 Rogozin, I. B., Carmel, L., Csuros, M., and Koonin, E. V. 2012 Origin and evolution of  
623 spliceosomal introns. *Biol. Direct* 7:11.  
624
- 625 Seitz, E. M., Brockman, J. P., Sandler, S. J., Clark, A. J., and Kowalczykowski, S. C. 1998 RadA  
626 protein is an archaeal RecA protein homolog that catalyzes DNA strand exchange. *Genes*  
627 *Dev.* 12: 1248–1253.  
628
- 629 Sela, I., Wolf, Y. I., and Koonin, E. V. 2016 Theory of prokaryotic genome evolution. *Proc.*  
630 *Natl. Acad. Sci. USA* 113: 11399–11407.  
631

- 632 Schurko, A. M., Logsdon, J. M. 2008 Using a meiosis detection toolkit to investigate ancient  
633 asexual ‘scandals’ and the evolution of sex. *BioEssays* 30: 579–589.  
634
- 635 Speijer, D., Lukes, J., Elias, M. 2015 Sex is a ubiquitous, ancient, and inherent attribute of  
636 eukaryotic life. *Proc. Natl. Acad. Sci. USA* 112: 8827–8834.  
637
- 638 Szollosi, G. J., Derenyi, I., Vellai, T. 2006 The maintenance of sex in bacteria is ensured by its  
639 potential to reload genes. *Genetics* 174: 2173–2180  
640
- 641 Takeuchi, N., Kaneko, K., and Koonin, E. V. 2014 Horizontal gene transfer can rescue  
642 prokaryotes from Muller's ratchet: benefit of DNA from dead cells and population  
643 subdivision. *G3* 4: 325–339.  
644
- 645 Thomas, C. M., and Nielsen, K. M. 2005 Mechanisms of, and barriers to, horizontal gene  
646 transfer between bacteria. *Nature Rev. Microbiol.* 3: 711–21.  
647
- 648 Timmis, J. N., Ayliffe, M. A., Huang, C. Y., and Martin, W. 2004 Endosymbiotic gene transfer:  
649 organelle genomes forge eukaryotic chromosomes. *Nature Rev. Genet.* 5: 123–135.  
650
- 651 Vos, M. 2009 Why do bacteria engage in homologous recombination? *Trends Microbiol.* 17:  
652 226–232.  
653
- 654 Vos, M., Hesselman, M. C., te Beek, T. A., van Passel, M. W., and Eyre-Walker, A. 2015 Rates  
655 of lateral gene transfer in prokaryotes: high but why? *Trends Microbiol.* 23: 598–605.

656

657 Williams, T. A., Foster, P. G., Cox, C. J., and Embley, T. M. 2013 An archaeal origin of  
658 eukaryotes supports only two primary domains of life. *Nature* 504: 231–236.

659

660 Wylie, C. S., Trout, A. D., Kessler, D. A., and Levine, H. 2010 Optimal strategy for competence  
661 differentiation in bacteria. *PLoS Genet.* 6: e1001108.

662

663 Zaremba-Niedzwiedzka, K., Caceres, E. F., Saw, J. H., Bäckström, D., Juzokaite, L., *et al.* 2017  
664 Asgard archaea illuminate the origin of eukaryotic cellular complexity. *Nature* 541: 353–358.

665

666 **Table 1. Parameters and variables**

667

668

|           |                                                            |
|-----------|------------------------------------------------------------|
| $N$       | <i>population size</i>                                     |
| $\mu$     | <i>mutation rate per bp per generation</i>                 |
| $g$       | <i>genome size (number of loci)</i>                        |
| $U$       | <i>genome-wide mutation rate</i>                           |
| $s$       | <i>strength of selection against deleterious mutations</i> |
| $\lambda$ | <i>LGT rate</i>                                            |
| $L$       | <i>eDNA length (number of loci)</i>                        |

669

670

671 **Figure legends**

672 **Figure 1 | Model dynamics.** After the birth of a new generation, new mutations are  
673 randomly introduced at a rate  $\mu$  per locus. Following mutational input, eDNA is acquired  
674 from the environment and randomly recombined at a rate  $\lambda$  per genome. A new generation  
675 is then sampled at random, in proportion to reproductive fitness  $w_m$ . The old generation  
676 dies and its DNA is released, constituting the eDNA pool for the new generation.

677

678 **Figure 2 | Genome size and population size determine  $n_0$ .** The equilibrium number of  
679 individuals in the least-loaded class ( $n_0$ ) is shown as a function of genome size (number of  
680 loci) and population size, with constant mutation rate  $\mu = 10^{-8}$  and constant strength of  
681 selection  $s = 10^{-3}$ .

682

683 **Figure 3 | Impact of LGT and genome size on the ratchet.** The average extinction time of  
684 the Least-Loaded Class is shown as a function of genome size ( $g$ ) for various recombination  
685 lengths ( $L$ ), in the presence of a) low ( $\lambda = 0.01$ ) and b) high ( $\lambda = 0.1$ ) LGT rates. The blue  
686 lines show the extinction time when there is no LGT, and is the same in a) and b).  
687 Parameters:  $s = 10^{-3}$ ,  $N = 5 \times 10^3$ ,  $\mu = 10^{-7}$ . Error bars show the standard deviation  
688 over 50 independent iterations.

689

690 **Figure 4 | Impact of LGT and genome size on the rate of accumulation of mutation.** The  
691 two upper panels show the mean genome-wide rate of fixation of deleterious mutations per  
692 generation, calculated over a time interval  $t = 10^5$  generations, as a function of genome  
693 size. Similarly, the two lower panels show the rate of fixation per single locus per  
694 generation. As genome size increases, LGT becomes less effective in reducing the



695 mutational burden of a population. An increase in recombination length improves the  
696 efficiency of LGT in preventing the accumulation of mutations, but this beneficial effect  
697 declines rapidly with genome size. Only if recombination length is of the same order of  
698 magnitude as genome size ( $L = 0.2g$ ) and the rate of LGT is high ( $\lambda = 10^{-1}$ ) large genomes  
699 can be maintained in a mutation-free state. Parameters:  $\lambda = 10^{-2}$  (left panels) and  $\lambda =$   
700  $10^{-1}$  (right panels),  $s = 10^{-3}$ ,  $N = 10^4$ ,  $\mu = 10^{-7}$ . Error bars show the standard deviation  
701 over 50 independent iterations.

702

### 703 **Figure 5 | Fixation of mutations in the core and accessory genome**

704 Fixed mutations in the core and accessory genome after  $t = 10^5$  generations for different  
705 genome size ( $g = 100, 500$ ), without and with LGT ( $\lambda = 0.1, L = 5$ ). Mutations  
706 preferentially accumulate in the accessory genome under weaker selection ( $s = 0.001$ ),  
707 while the strongly selected core genome ( $s = 0.005$ ) accumulates few or no mutations. The  
708 rate of fixation increases with genome size, while the benefits of LGT decline with genome  
709 size. Parameters:  $\lambda = 10^{-1}, L = 5, N = 10^4, \mu = 10^{-7}$ .

710

711 **Figure 6 | Rate of fixation of mutations in the core and accessory genome.** The fixation of  
712 mutants in the core and in the accessory genome is shown after  $t = 10^5$  generations,  
713 normalised by genome size. A significantly higher number of mutations accumulate in those  
714 regions of the accessory genome that are under weaker selection. Genome size expansion  
715 increases the severity of the ratchet and the number of fixed mutations in the core and  
716 accessory genome. The introduction of LGT considerably reduces the mutational burden.  
717 Parameters:  $\lambda = 10^{-1}, L = 5, N = 10^4, \mu = 10^{-7}, s_{core} = 0.005$  and  $s_{acc} = 0.001$ .

718

719 **Figure 1**

720

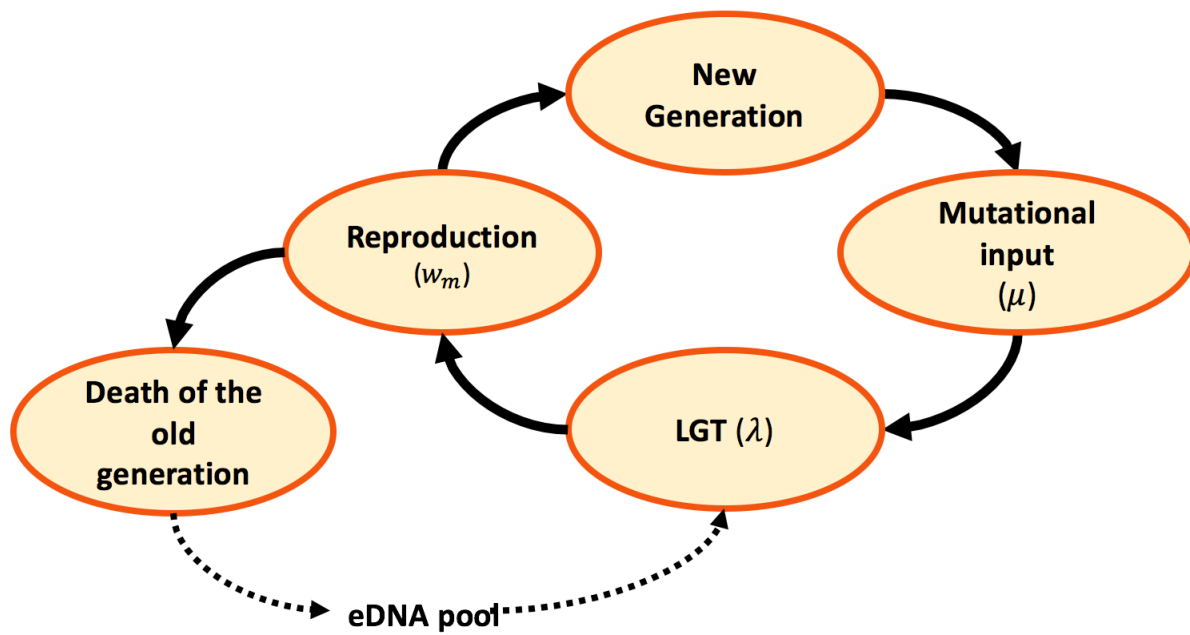

721

722 **Figure 2**

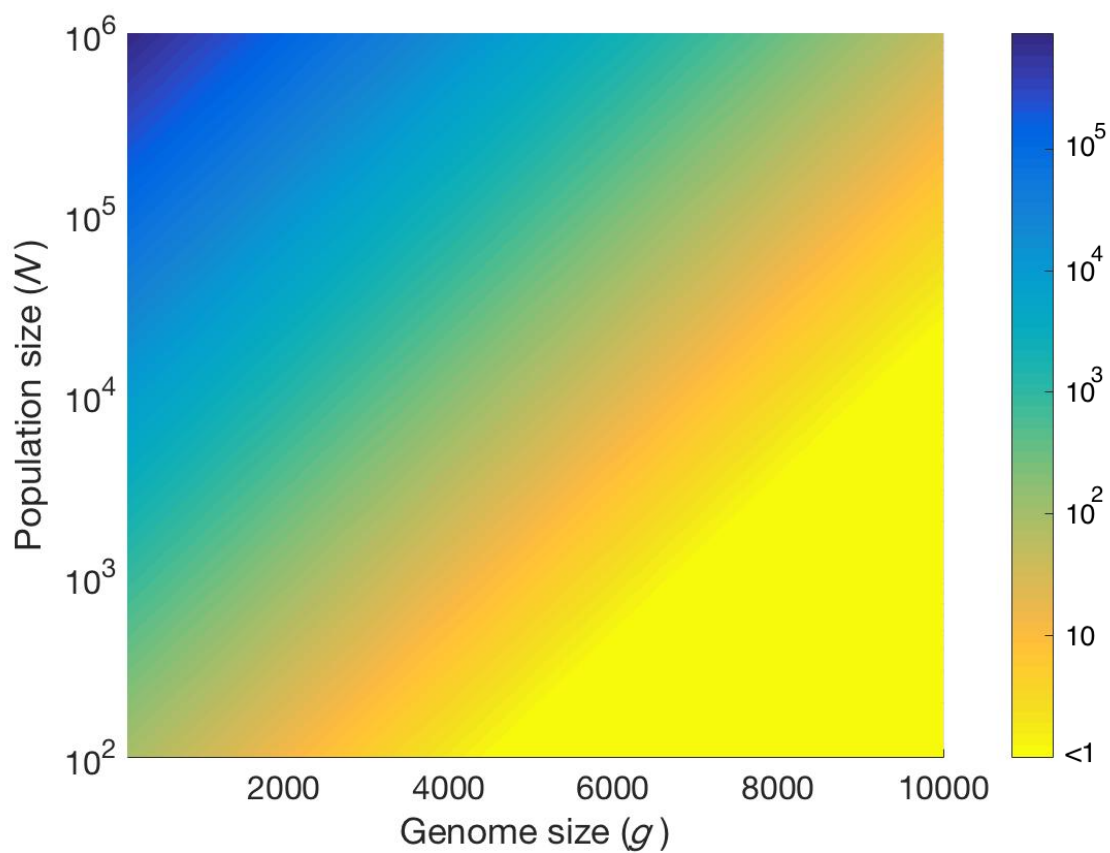

723

724

725

726

727

728

729

730

731

732

733

734

735

736

737

738

739 **Figure 3**

740

741

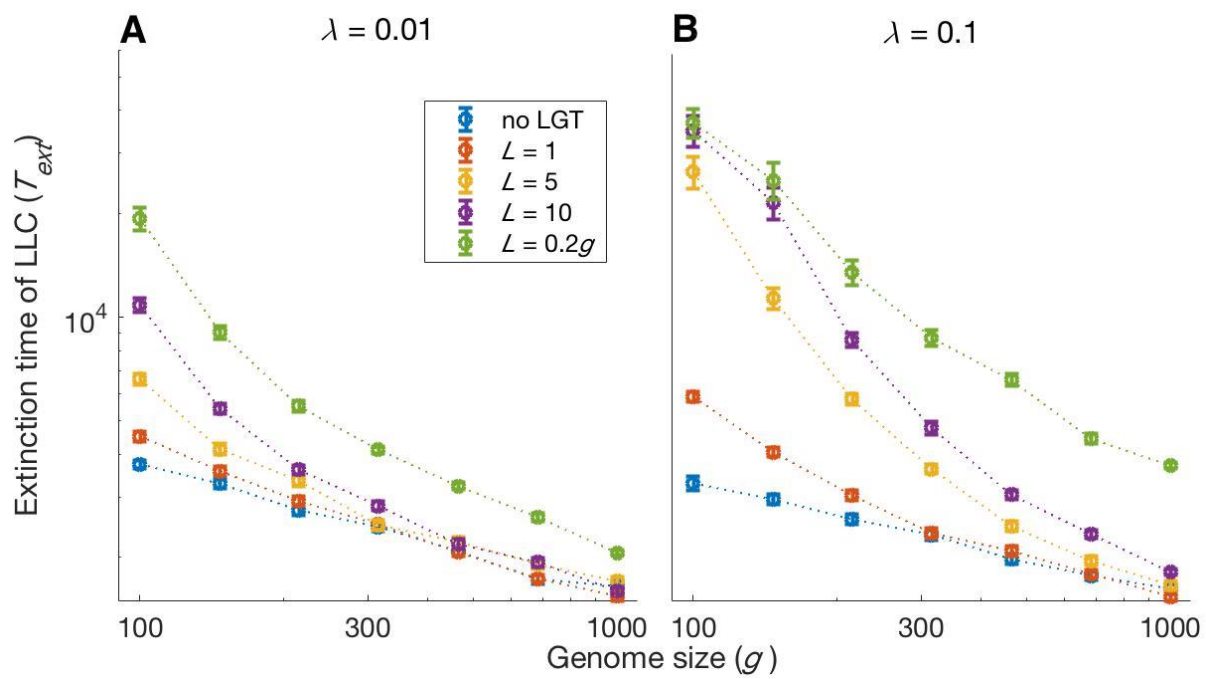

742

743

744

745

746 **Figure 4**

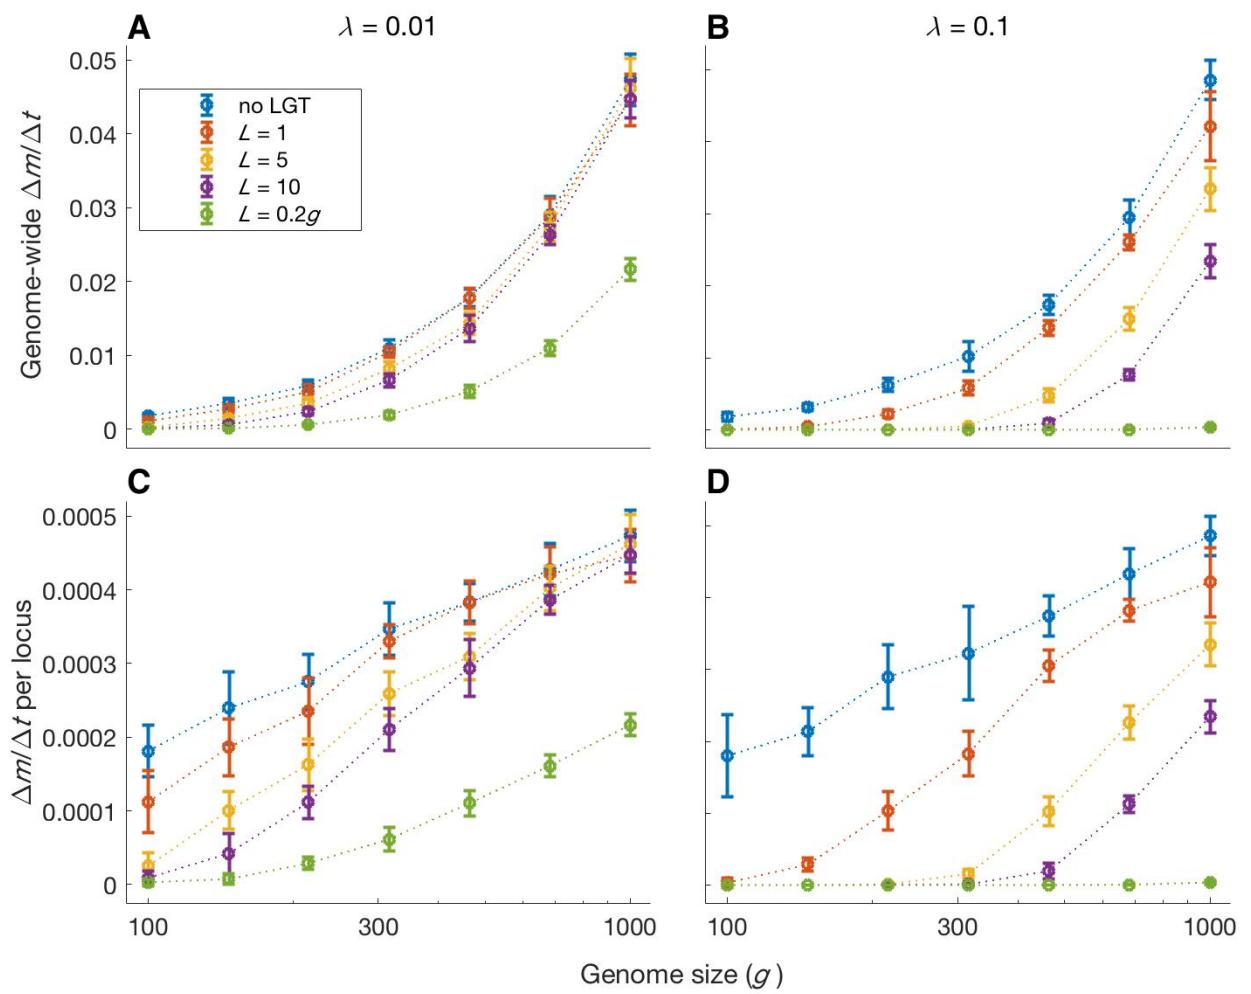

747

748

749 **Figure 5**

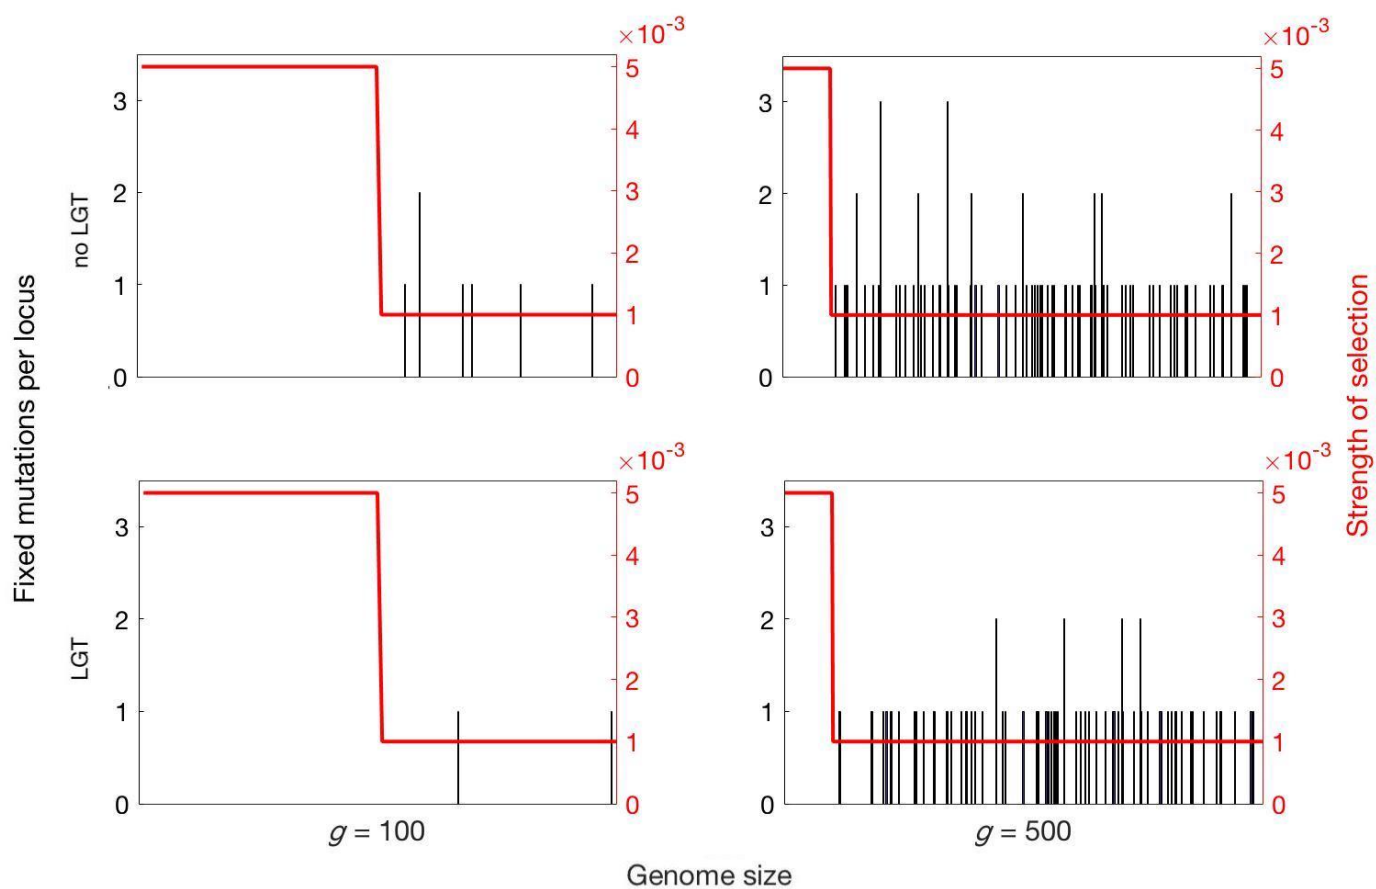

750  
751  
752  
753  
754  
755  
756  
757  
758  
759  
760  
761  
762  
763  
764  
765

766 **Figure 6**

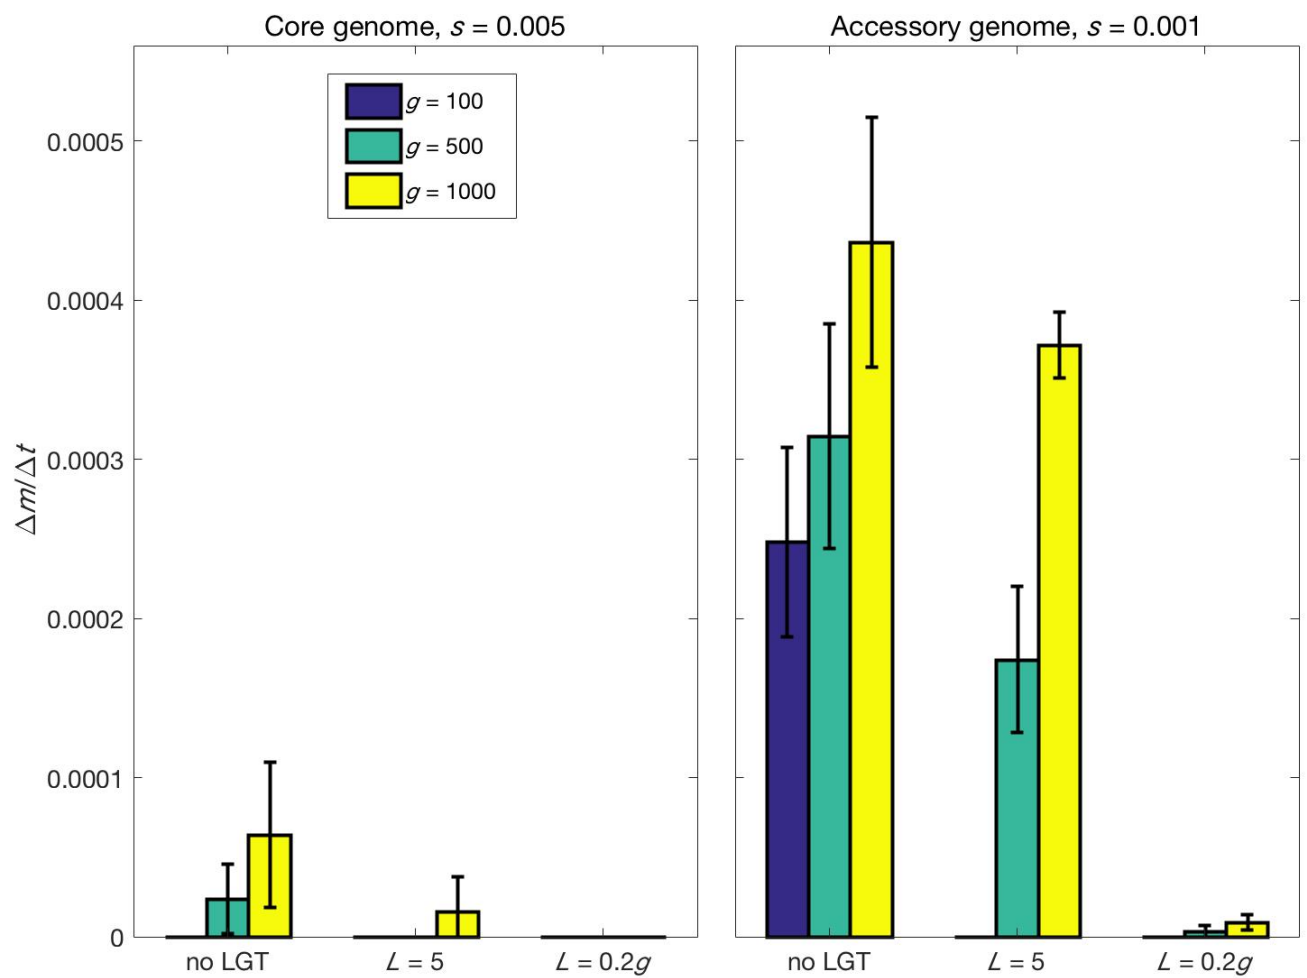

767

768

769
